# Supplementary material for: Magnetic nanoparticle-enhanced SPR on gold nanoslits for ultra-sensitive, label-free detection of nucleic acid biomarkers
Source: Royal Society of Chemistry journal article supplement (doi:10.1039/c3an36655c), 2013-01-01
Supplement: c3an36655c.pdf [file c3an36655c.pdf]

## Supplementary information

### 2.1. Materials.

Fe<sub>3</sub>O<sub>4</sub> MNPs modified with amino groups (TANBead<sup>®</sup> USPIO-101) with particle sizes of 6~10 nm and concentrations of 10 mg/ml ( $1.4 \times 10^{16}$  MNPs/ml) were obtained from Tanbead. The MNP surface was further reacted with a cross-linker, sulfosuccinimidyl 4-(N-maleimidomethyl) cyclohexane-1-carboxylate (sulfo- SMCC, Thermo scientific Prod# 22322). Modified oligonucleotides were purchased from Proligo. The oligonucleotide sequences are listed in Table S1.

**Fig. S1** (a) Fabrication process of gold nanoslits (nanoimprinting lithography), (b) SEM image of gold nanoslits.

**Figure S2** Control tests. (a) An MNP suspension that was not incubated with the target molecule (blank sample) is introduced to the SPR chip. The dynamic SPR response is shown. No shift in the SPR spectrum position was observed within 30 minutes after introduction of the sample. (b) Seven microliters of 10  $\mu$ M non-complementary target was mixed with 7  $\mu$ l of MNP suspension and allowed to react for 30 minutes. MNPs were isolated and introduced to the SPR chip. A  $0.7 \pm 0.14$  nm shift in the SPR spectrum position was observed after the introduction of MNPs carrying a non-complementary target molecule.

**Table S1** Sequences of probes, synthetic target, non-complementary targets and primers for PCR.

**Figure S1**

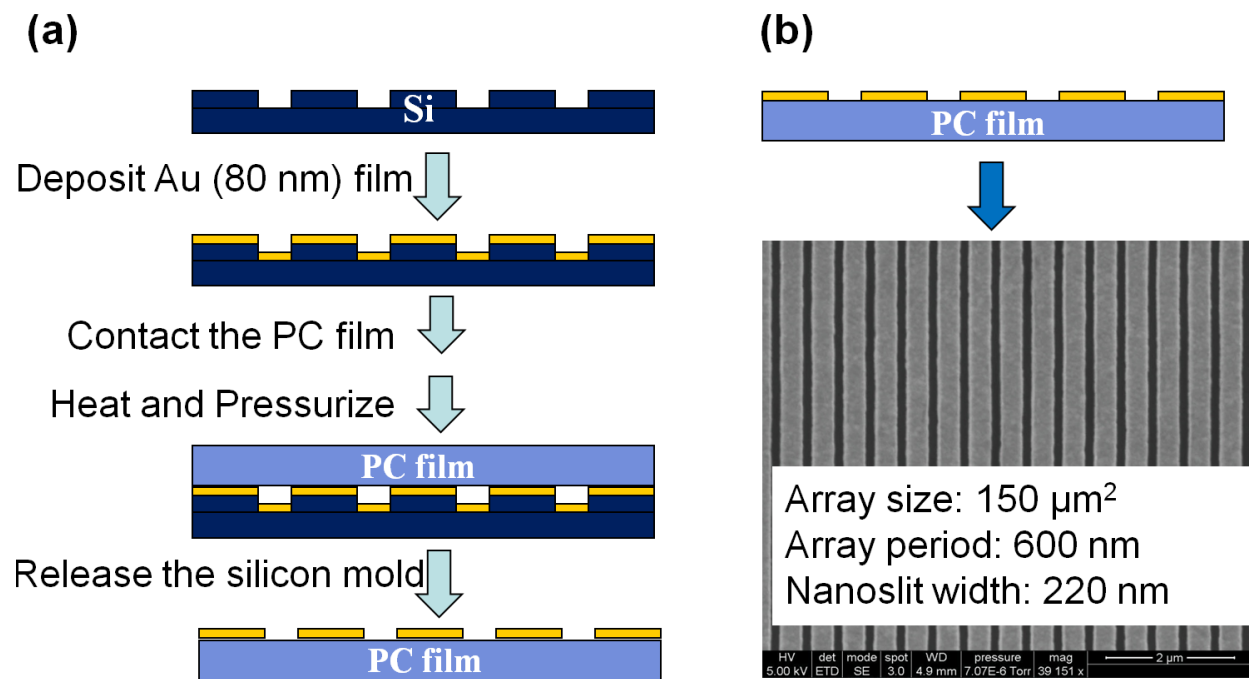

**Figure S2**

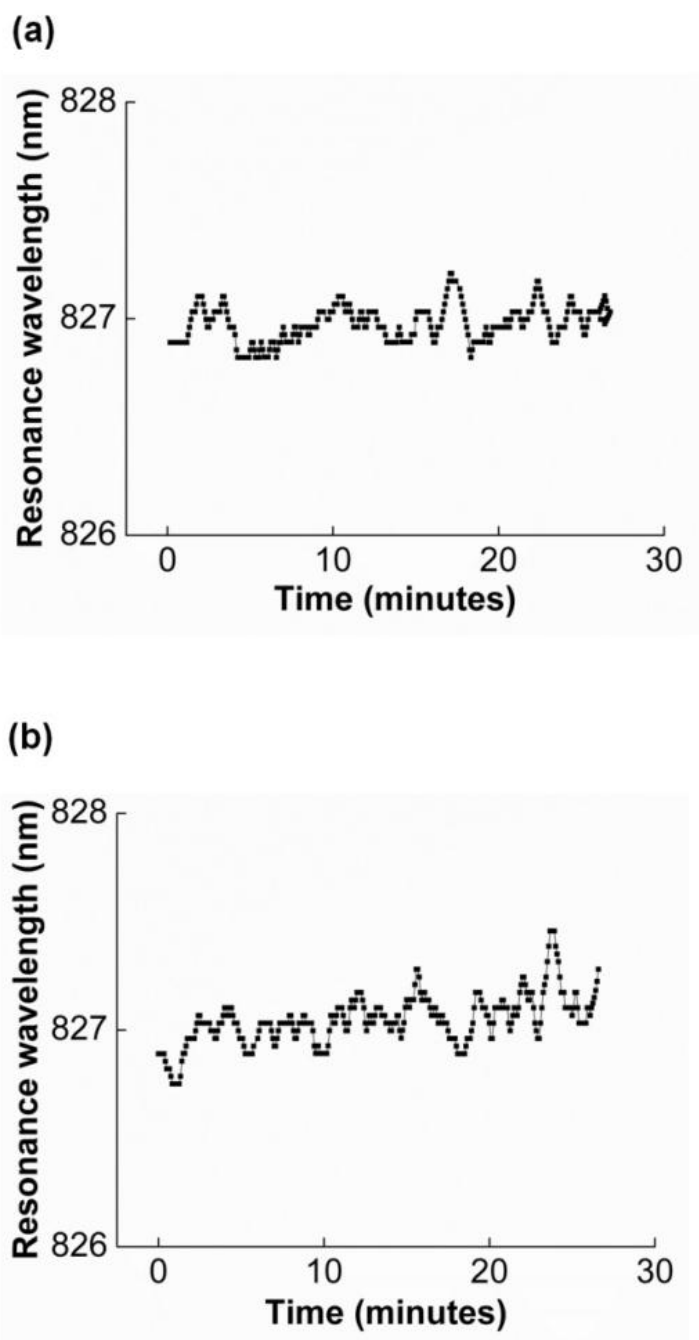

**Table S1**

| Oligonucleotide                                 | Sequence (5' → 3')                                                  | Modification                        |
|-------------------------------------------------|---------------------------------------------------------------------|-------------------------------------|
| Probe I <sup>1</sup>                            | G TTCCTTTTCTCTCTTTTTTCTCTCCAAAG                                     | 5' modification (C <sub>6</sub> SH) |
| Probe II <sup>2</sup>                           | AACAGTTTCTAAAGTTTTTCTCCATCGCGGA                                     | 3' modification (C <sub>3</sub> SH) |
| Target <sup>3</sup>                             | TCCGCGATGGAGAAAAC TTTAGAAACTGTTTCCTTT<br>GGAGAGGAAAAAGAGAGAAAAGGAAC | None                                |
| Non-complementary sequence (GAPDH) <sup>4</sup> | ATGGCCTCCAAGGAGTAAGACCCCTGGACCACCAG<br>CCCCAGCAAGAGCACAAGAGGAAGAG   | None                                |
| Non-target 50% similar sequence <sup>5</sup>    | ACGGGGTTCGTGTATAGTATTGTATCAGATCCATA<br>GCACACGTATATGTGTGTATACGTAG   | None                                |
| Non-target 70% similar sequence <sup>5</sup>    | AGCGGGATCGAGTAAAGTTTTGAATCTGATCCATT<br>GCAGACGAATAAGTGAGTAAACGATG   | None                                |
| Non-target 80% similar sequence <sup>5</sup>    | ACCGCCATGGTGAAATCTTTTGAAAGTGTTTCCTTT<br>CGAGACGAAATAGAGTGAAATGGAAG  | None                                |
| Non-target 90% similar sequence <sup>5</sup>    | ACCGCGATGGTGAAAAC TTTTGAAACTGTTTCCTTT<br>GGAGACGAAAAAGAGTGAAAAGGAAG | None                                |
| Forward primer                                  | CCGCGATGGAGAAAAC TTTAGAAAC                                          | None                                |
| Reverse primer                                  | CAGCCATGGCAGCATCAACCT                                               | None                                |

1- Complementary sequence to the region of 242-271 of hnRNP B1 mRNA (Accession: NM\_031243)

2- Complementary sequence to the region of 211-240 of hnRNP B1 mRNA (Accession: NM\_031243)

3- Sequence of 211-271 region of hnRNP B1 mRNA (Accession: NM\_031243)

4- Sequence of 1093-1152 region of GAPDH mRNA (Accession: NM\_002046.3)

GAPDH mRNA is a commonly used housekeeping genes used in comparisons of gene expression data.

5-Four different sequences with different degree of similarity with target sequence
